## Correction: *Prosopis juliflora* (Sw.), DC induces apoptosis and cell cycle arrest in triple negative breast cancer cells: *in vitro* and *in vivo* investigations

**Bhimashankar Gurushidhappa Utage<sup>1,2</sup>, Milind Shivajirao Patole<sup>1</sup>, Punam Vasudeo Nagvenkar<sup>1</sup>, Sonali Shankar Kamble<sup>2</sup> and Rajesh Nivarti Gacche<sup>2,3</sup>**

<sup>1</sup> National Centre for Cell Science, NCCS Complex, Pune, 411007, MS, India

<sup>2</sup> School of Life Sciences, S.R.T.M. University, Nanded, 4316069, MS, India

<sup>3</sup> Department of Biotechnology, Savitribai Phule Pune University, Pune, 411007, MS, India

**Published:** August 31, 2018

**Copyright:** Utage et al. This is an open-access article distributed under the terms of the Creative Commons Attribution License 3.0 (CC BY 3.0), which permits unrestricted use, distribution, and reproduction in any medium, provided the original author and source are credited.

**This article has been corrected:** The correct order of authors' names is given below:

**Bhimashankar Gurushidhappa Utage<sup>1,2</sup>, Milind Shivajirao Patole<sup>1</sup>, Punam Vasudeo Nagvenkar<sup>1</sup>, Sonali Shankar Kamble<sup>2</sup> and Rajesh Nivarti Gacche<sup>2,3</sup>**

Original article: Oncotarget. 2018; 9:30304-30323. <https://doi.org/10.18632/oncotarget.25717>
